# Supplementary material for: Possible testosterone redundancy for 5α-dihydrotestosterone in the masculinization of mouse external genitalia
Source: PubMed Central journal article supplement — Exp Anim. 2022 May 24;71(4):451–9. doi: 10.1538/expanim.22-0038 (PMC9671772; doi:10.1538/expanim.22-0038), 2022-05-24
Supplement: expanim-71-451-s001.pdf [file expanim-71-451-s001.pdf]

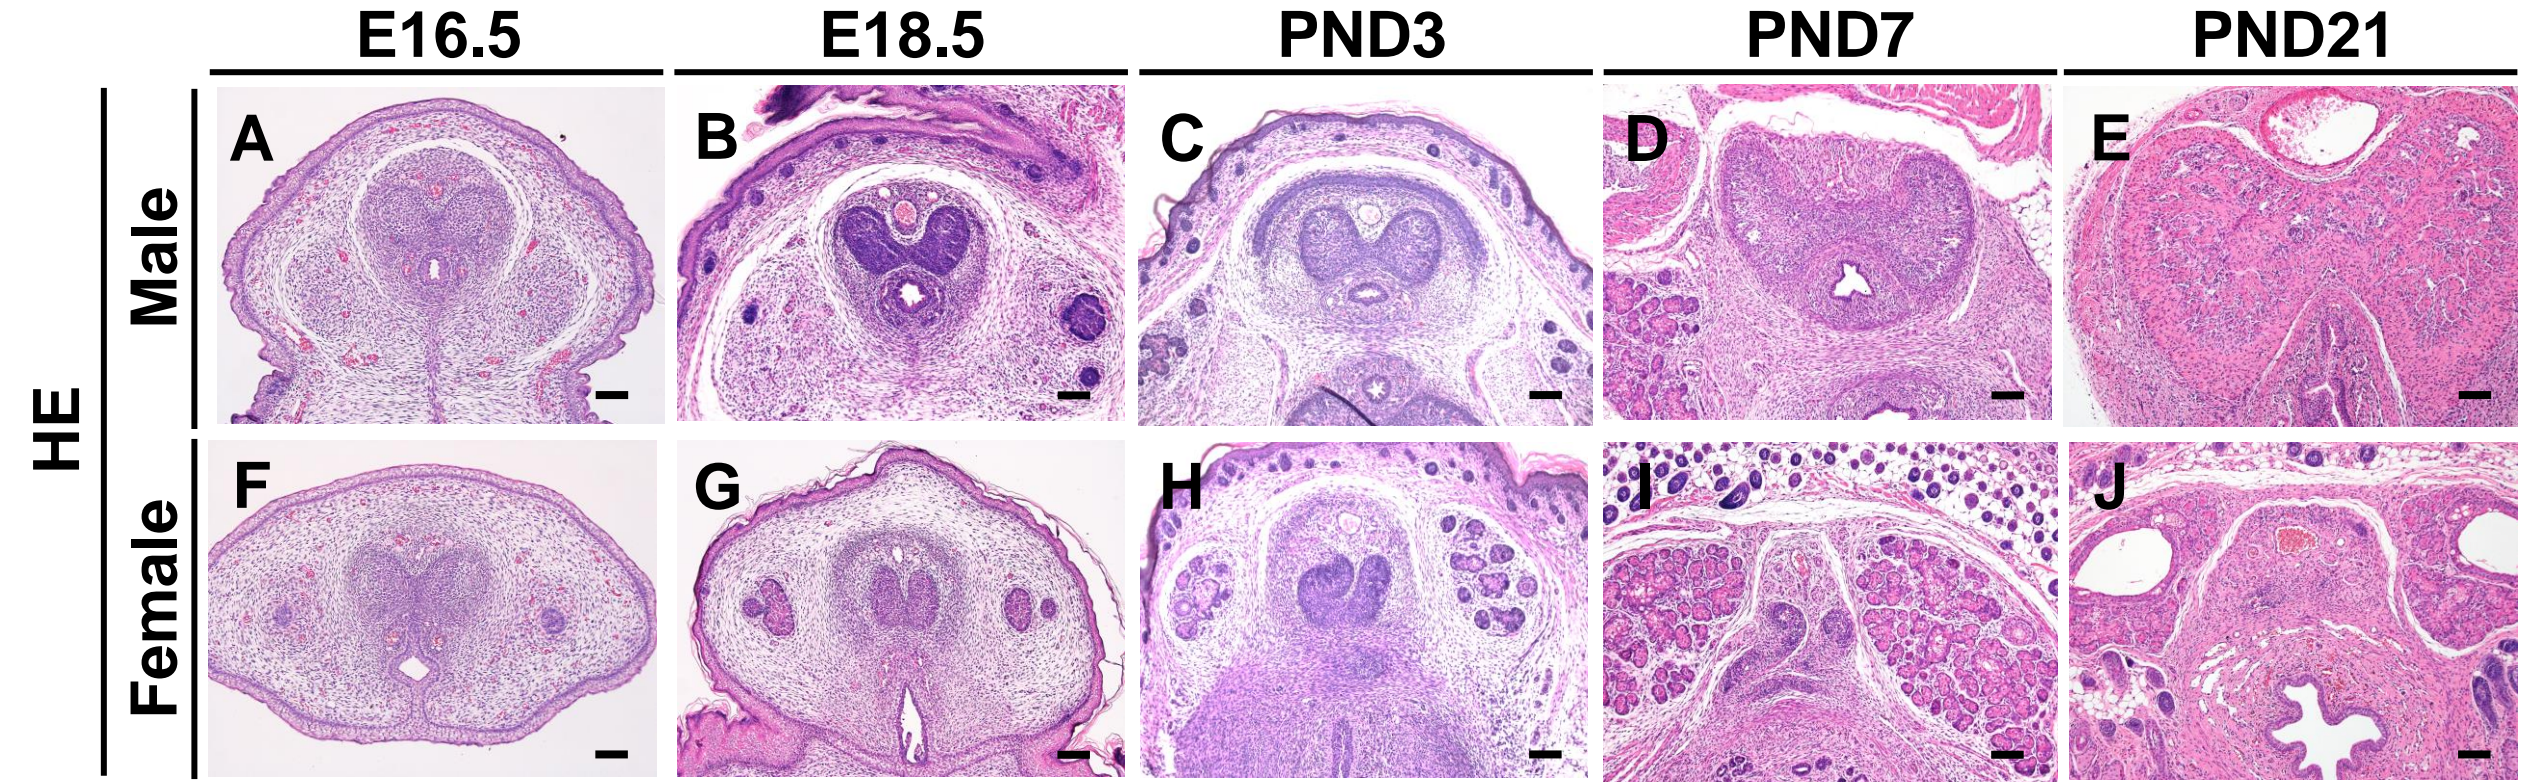

### Supplemental Figure 1

The HE images of CC development. (A-J) The male morphology (upper panels) and female morphology (lower panels) at E16.5, E18.5, PND3, PND7, and PND21. Scale bar: 100  $\mu$ m.
